# Supplementary material
Source: PubMed Central journal article supplement (PMC7948284)
Supplement: advancesADV2020003568-suppl1.pdf [file advancesADV2020003568-suppl1.pdf]

**Supplementary Table 1. Intensive Care Unit Admission Criteria**

**Criteria for Respiratory Failure**

1. Mechanical ventilation
2. Hypoxia with inability to wean FiO<sub>2</sub> to less than 60% to maintain SPO<sub>2</sub> >90%
3. Hypercapnia with pH<7.32
4. Initiation of high flow nasal cannula (HFNC)
5. Initiation of BiPAP or CPAP

# Supplementary Figure 1

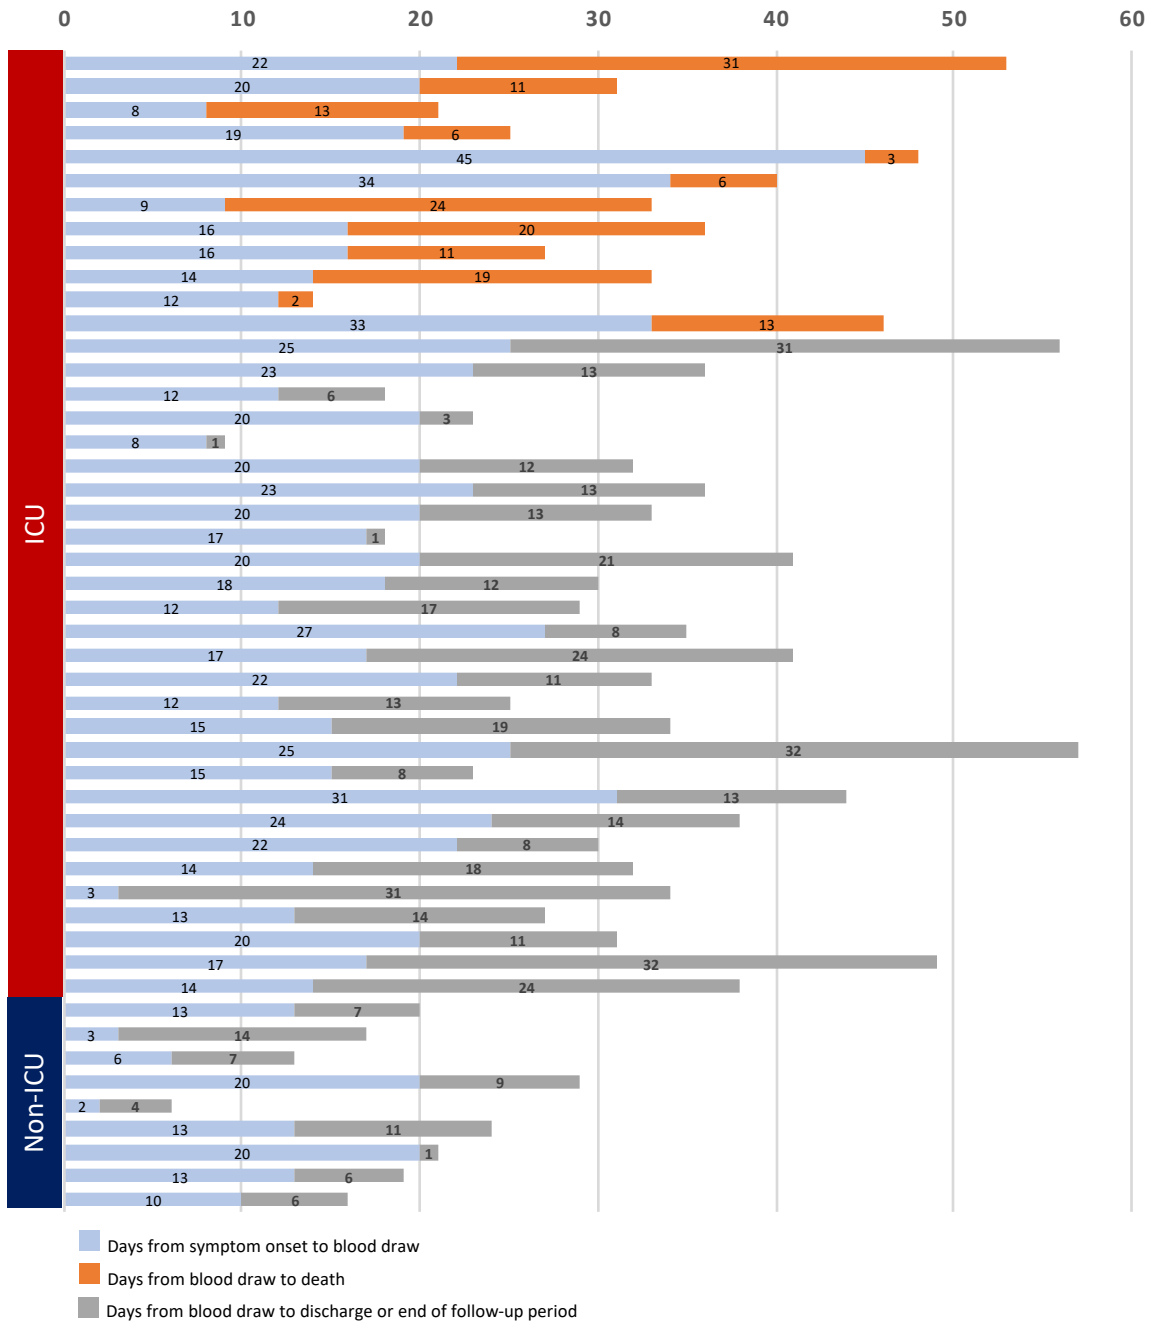

**Supplementary Figure 1.** Time course depicting duration from symptom onset to blood draw and duration from blood draw to death, discharge, or end of follow-up period for each patient in the cross-sectional cohort.

# Supplementary Figure 2

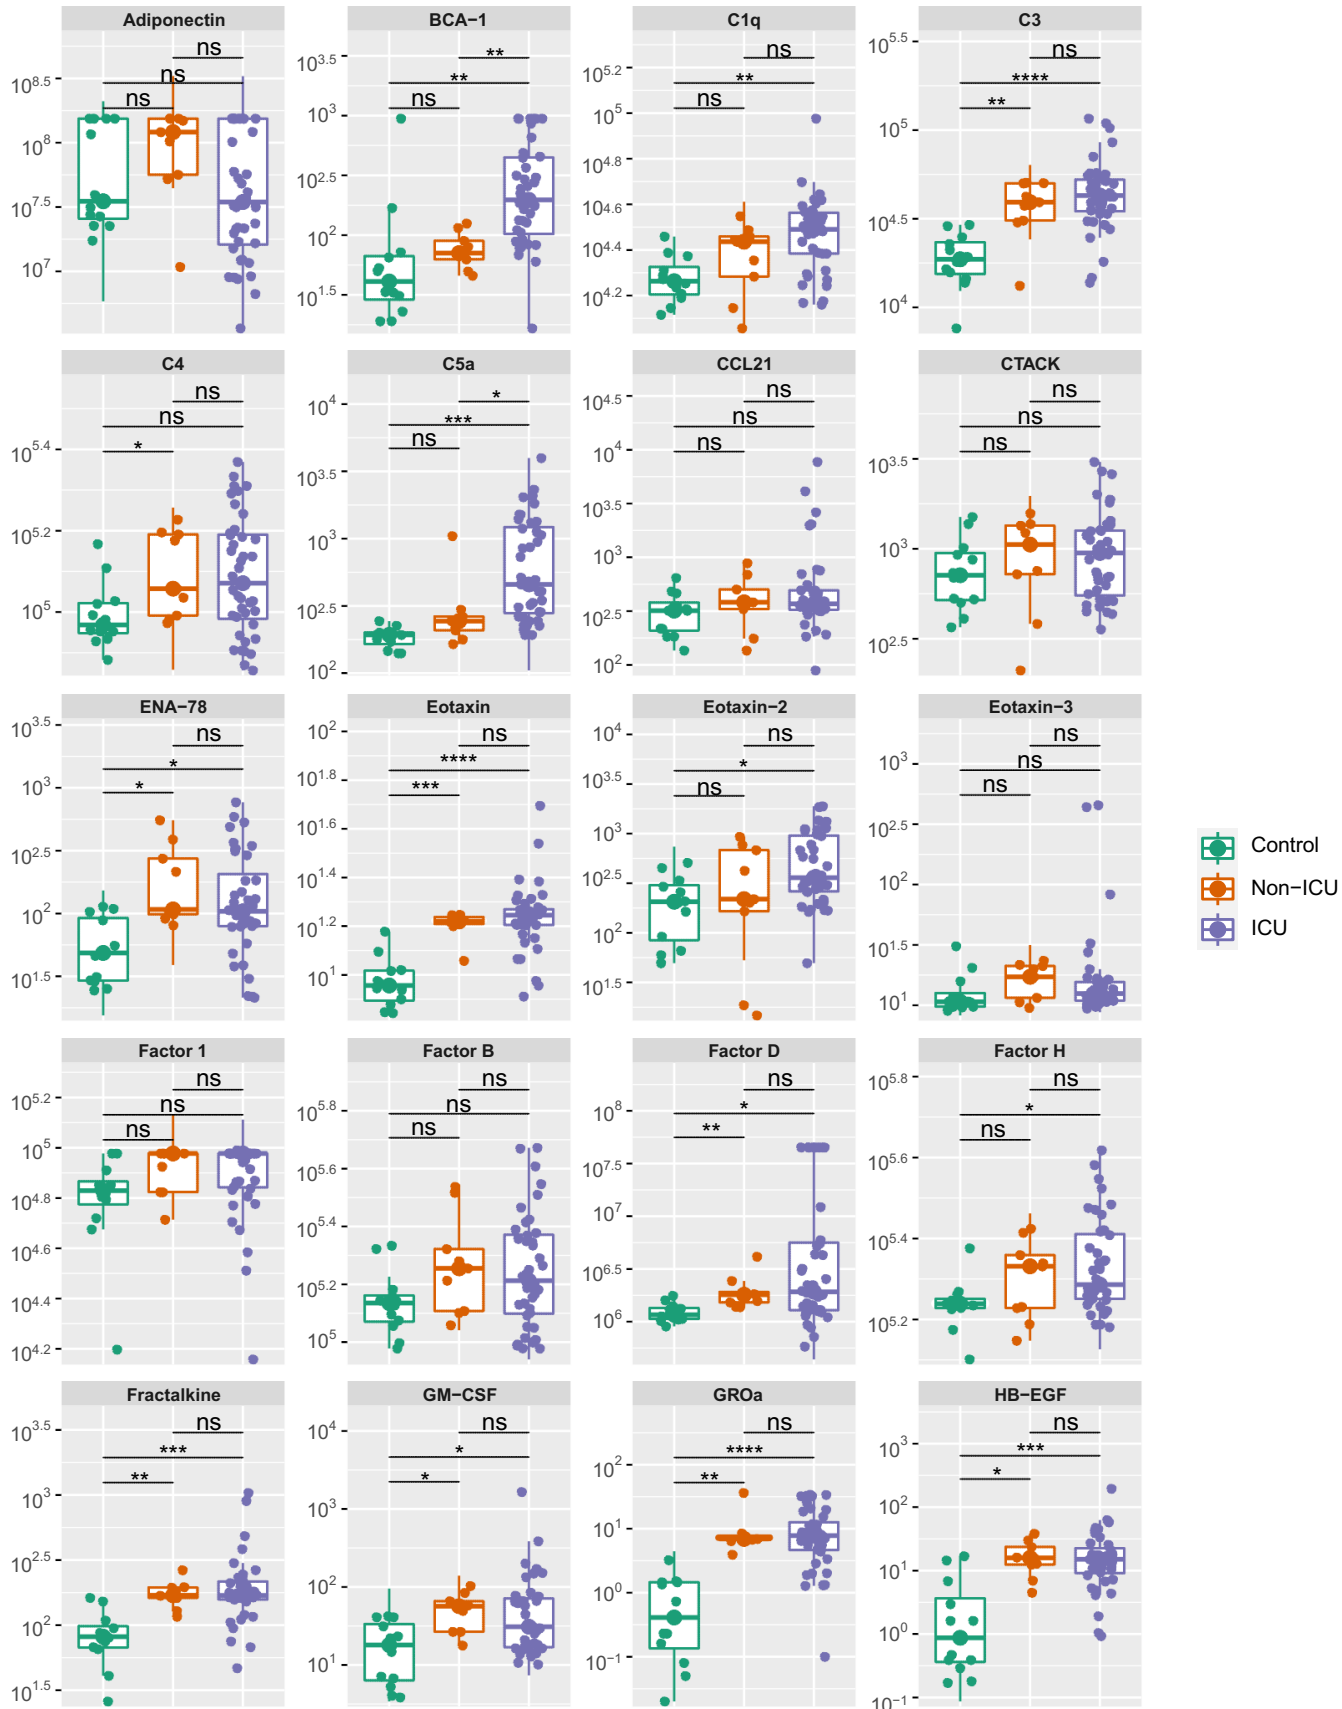

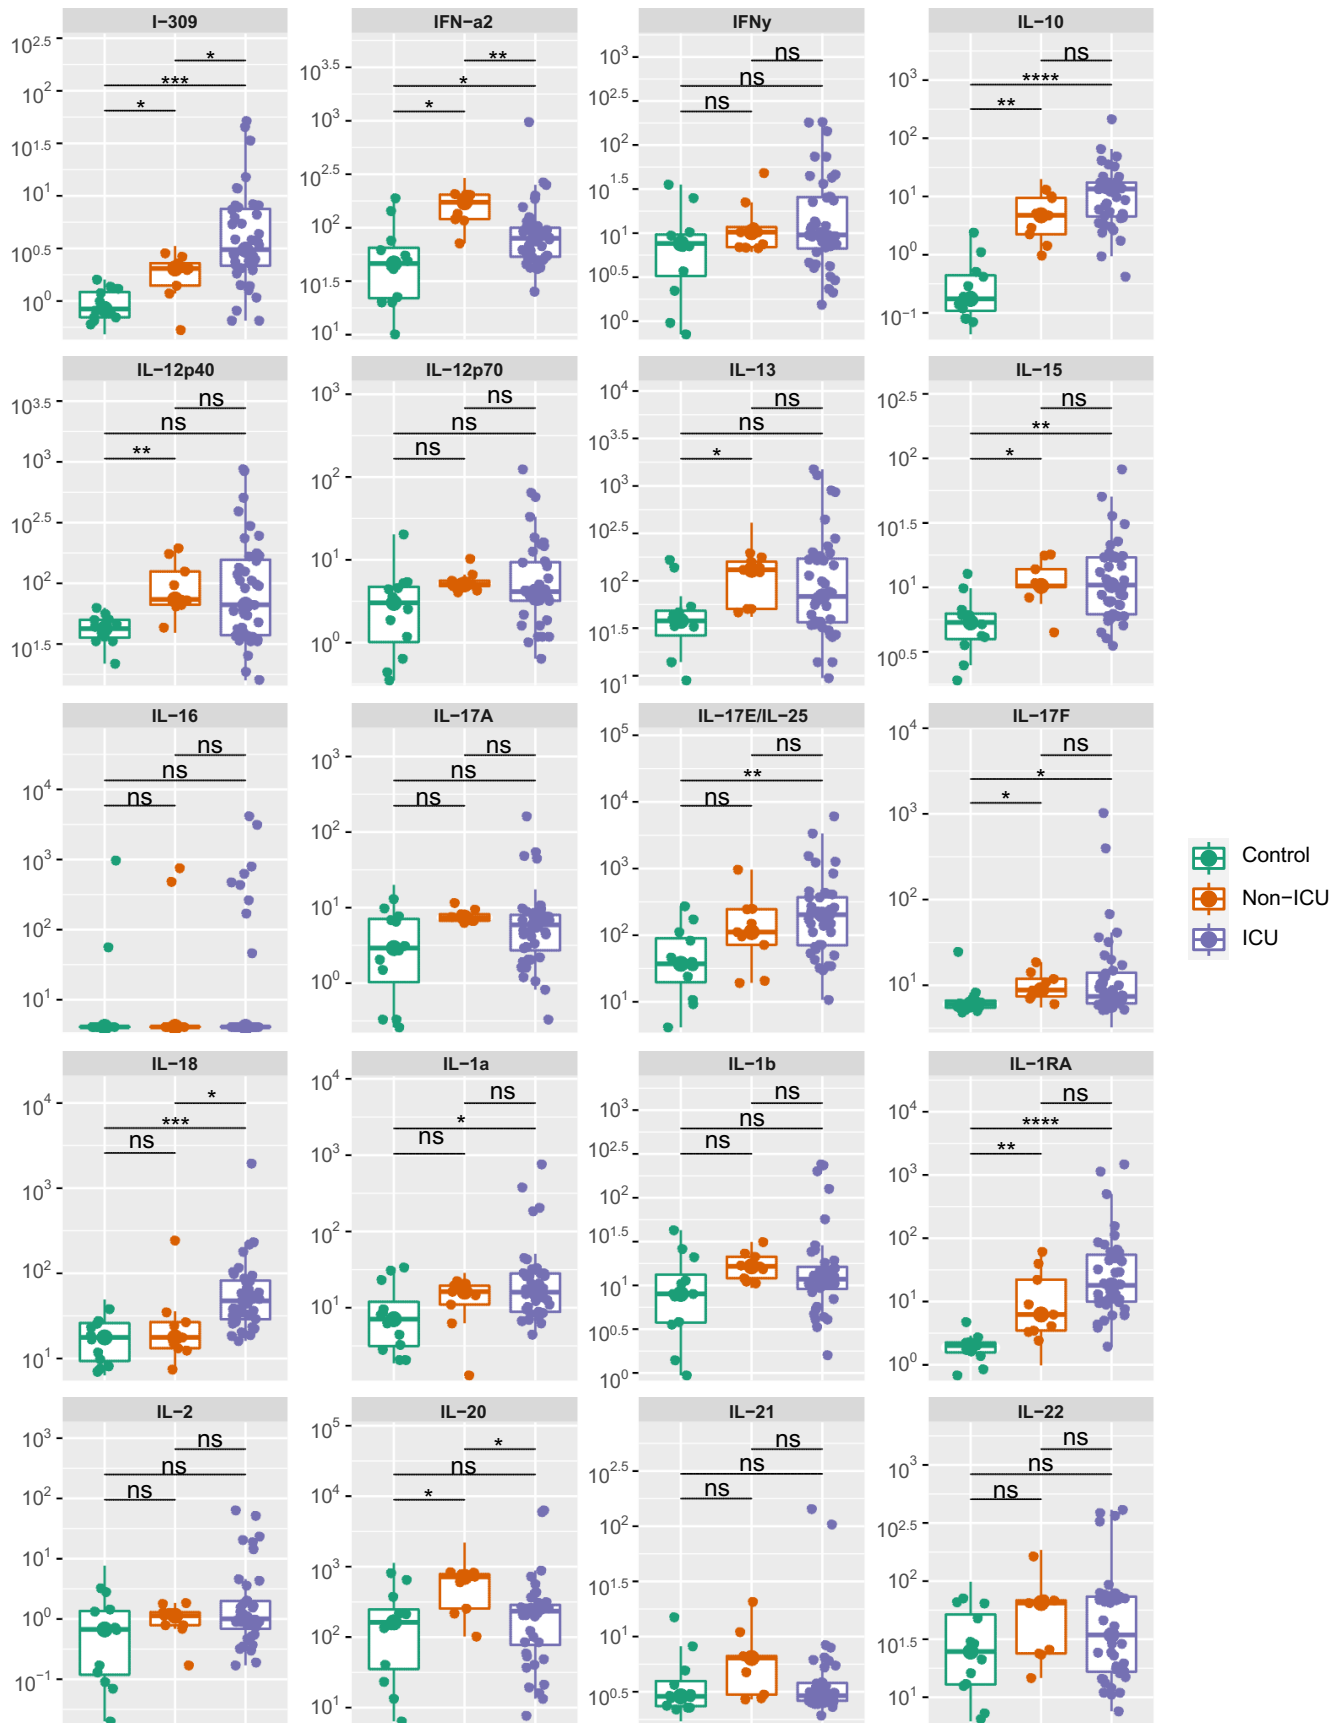

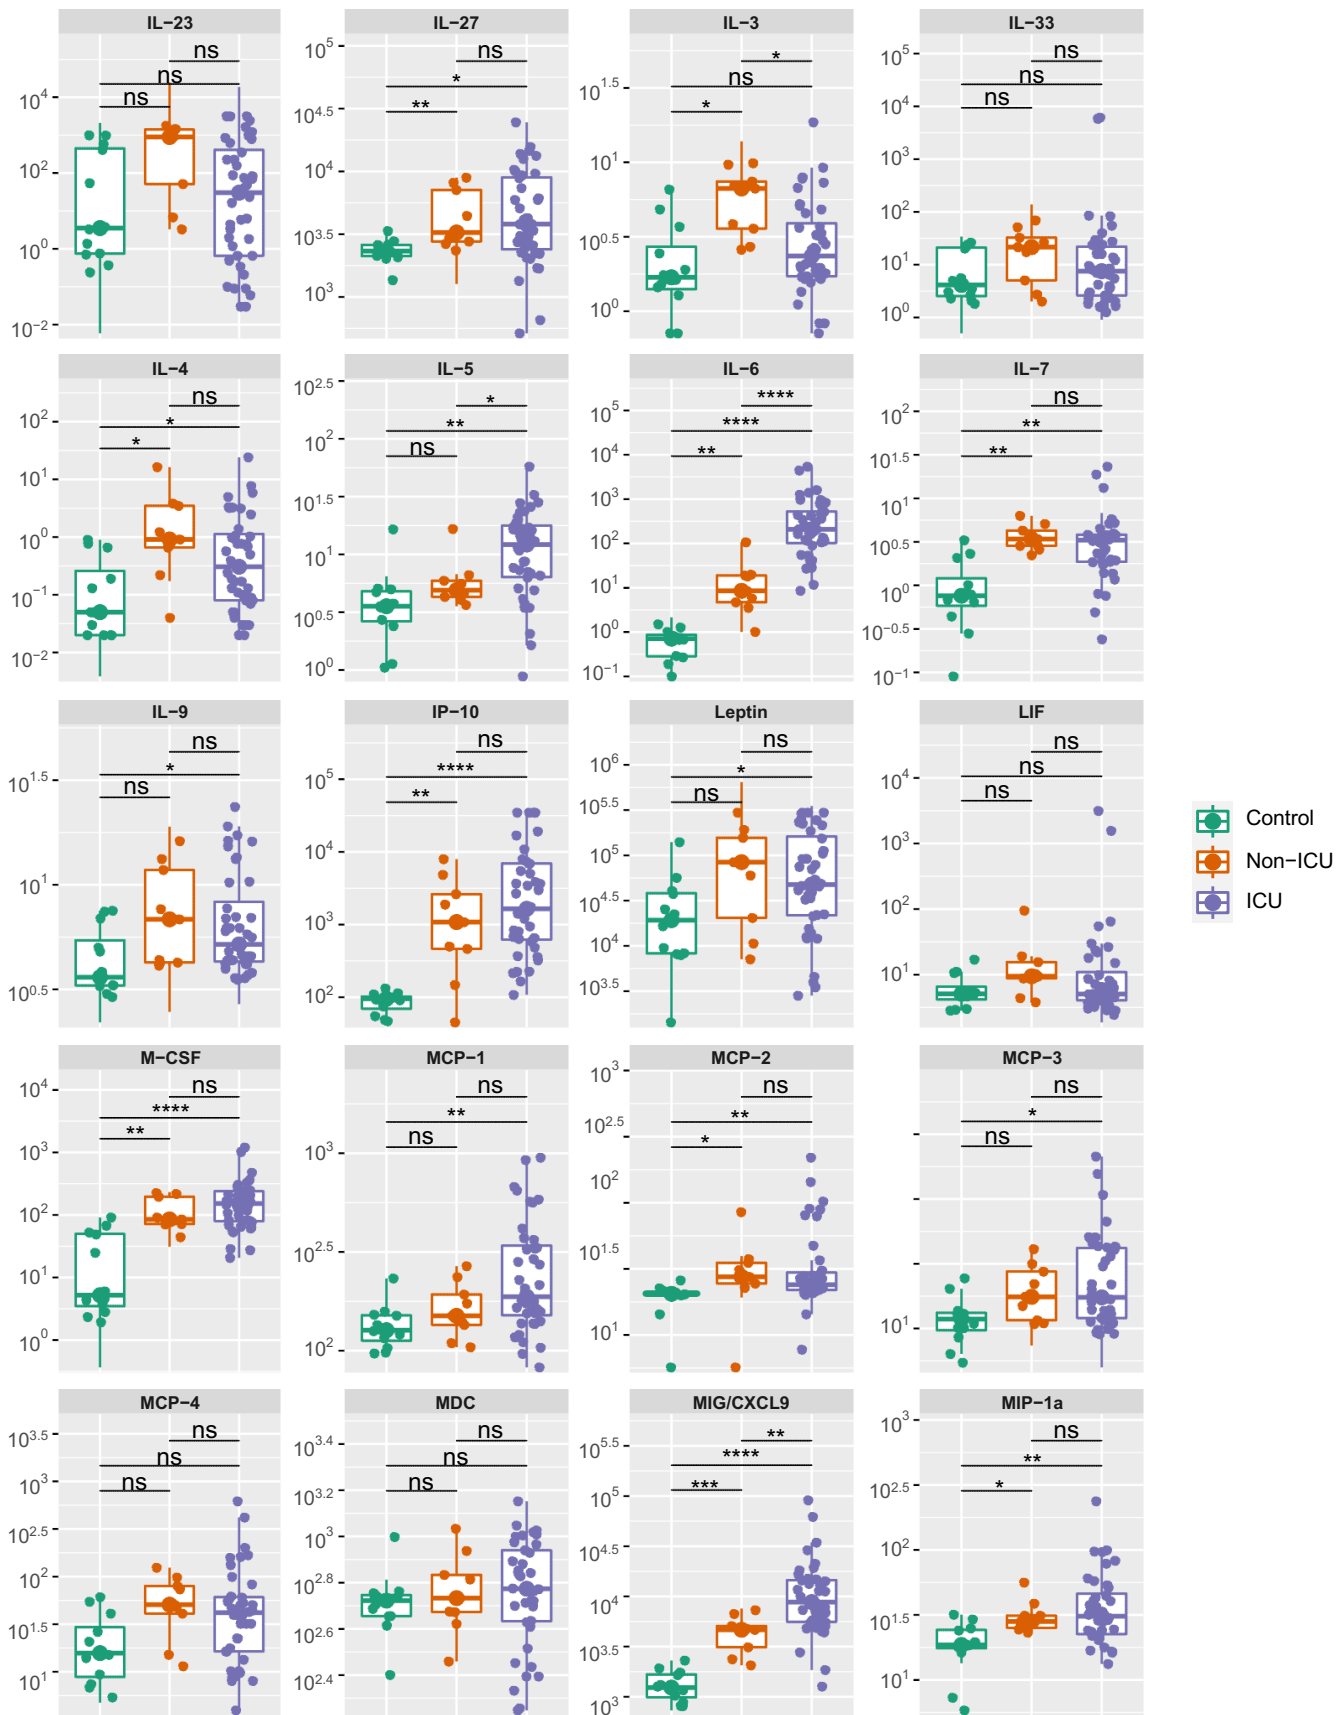

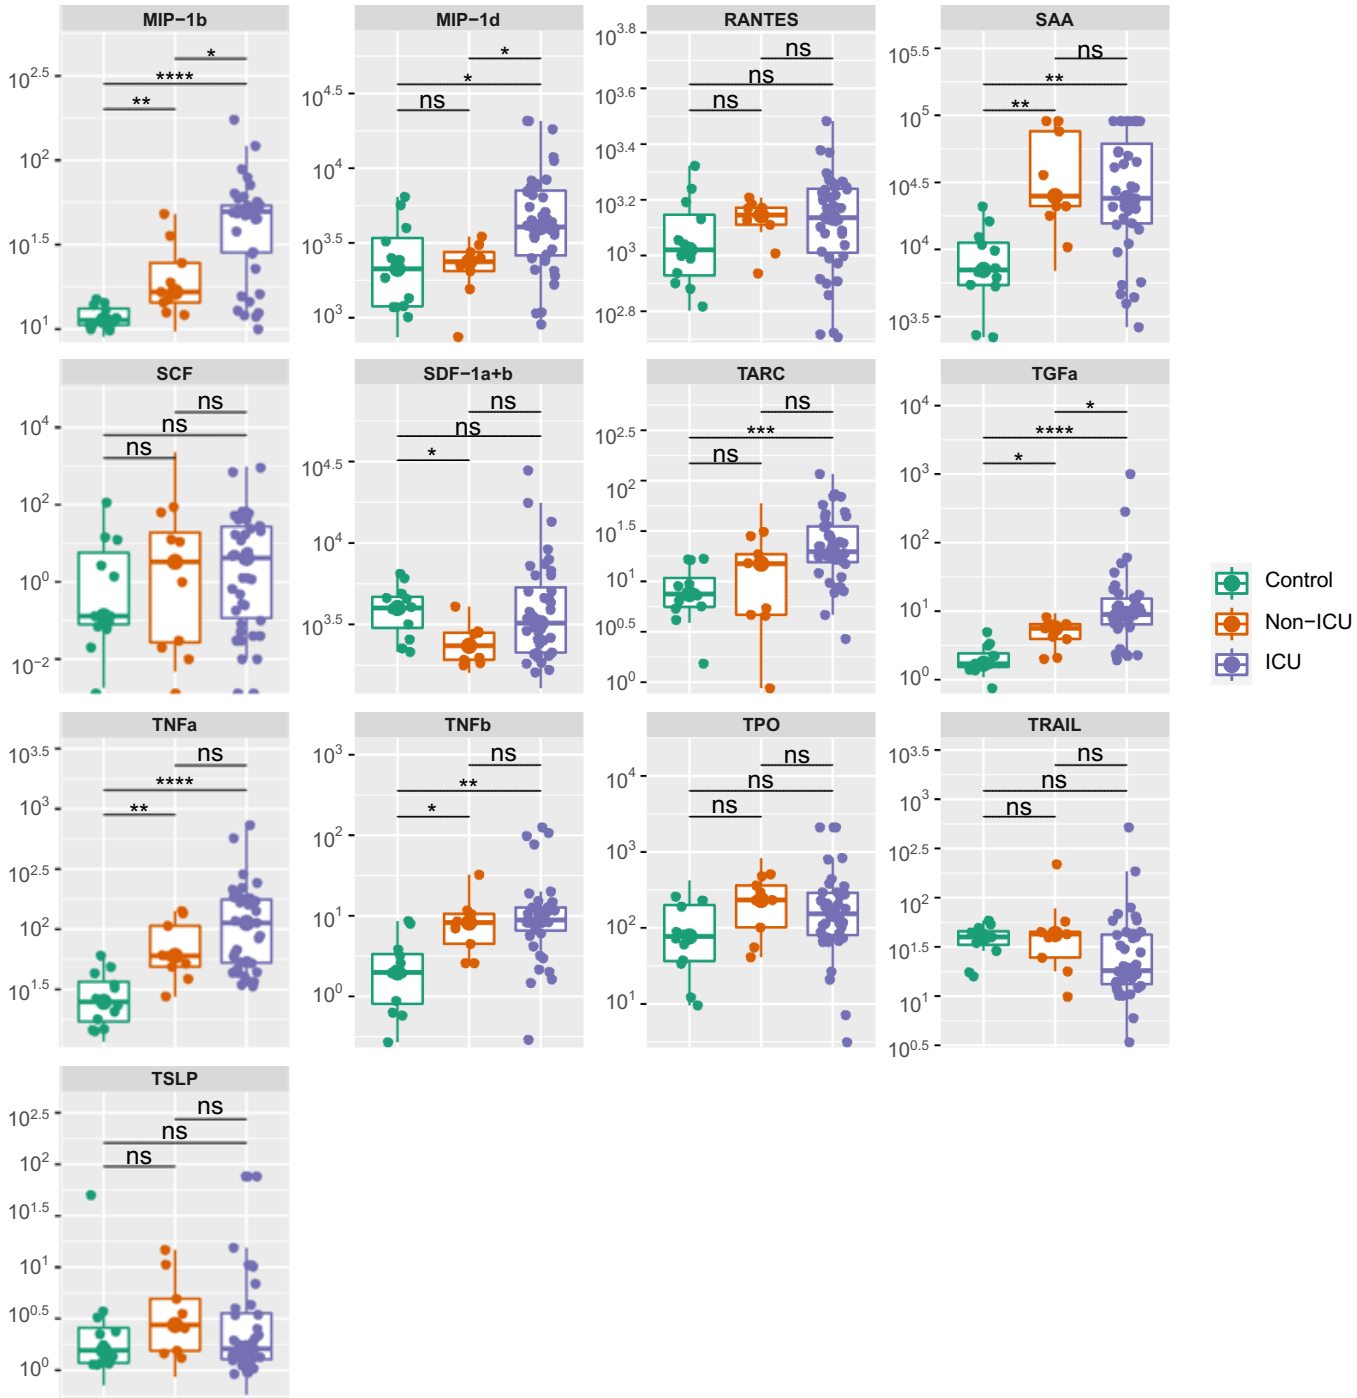

**Supplementary Figure 2.** Circulating levels of all measured biomarkers in the cross-sectional cohort, comparing: 1) controls, 2) non-ICU COVID-19, and 3) ICU COVID-19 patients. Asterisks denote statistically significant differences between groups ( $*p < 0.05$ ,  $**p < 0.01$ ,  $***p < 0.001$ ,  $****p < 0.0001$ ). All values are concentrations in pg/mL, except for C1q, C3, C4, CFB, CFH, CF1, and Adipsin, which are reported as ng/mL. ICU: intensive care unit.

## Supplementary Figure 3

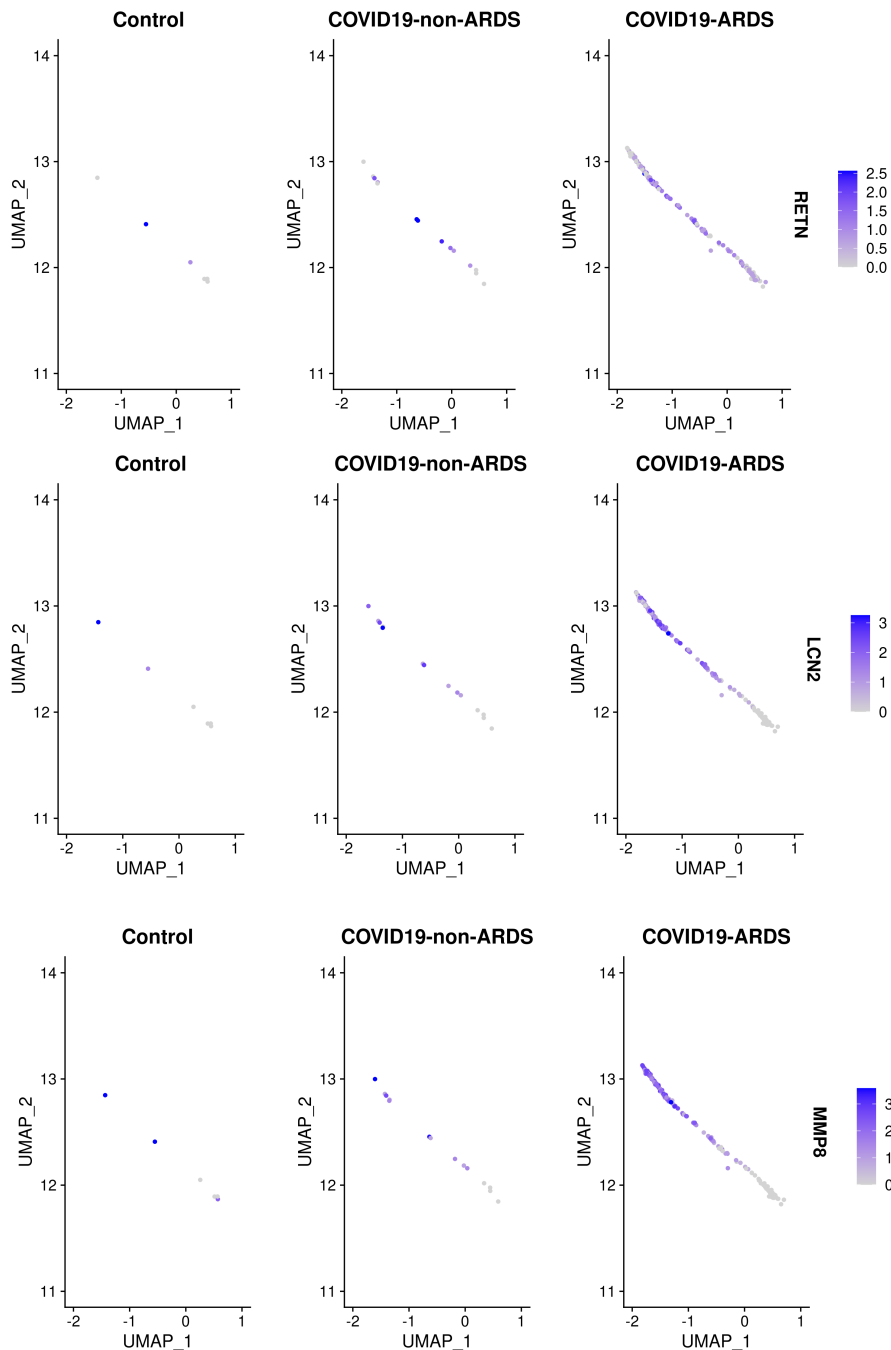

**Supplementary Figure 3.** Feature plot representation of neutrophil markers resistin (RETN), lipocalin-2 (LCN2), and matrix metalloproteinase 8 (MMP8) in the ‘Developing neutrophil’ population, re-analyzed from scRNAseq data published by Wilk et al, split by COVID-19 and ARDS status. The ‘Developing neutrophil’ population is mainly composed of cells from the COVID-19 ARDS samples (n=186) and includes few cells from the COVID19-non-ARDS (n=14) and Control (n=6) samples. The ‘Developing neutrophil’ population was subsetted from the larger single-cell RNAseq dataset of peripheral blood mononuclear cells from patients with COVID-19.<sup>3</sup>

**a**

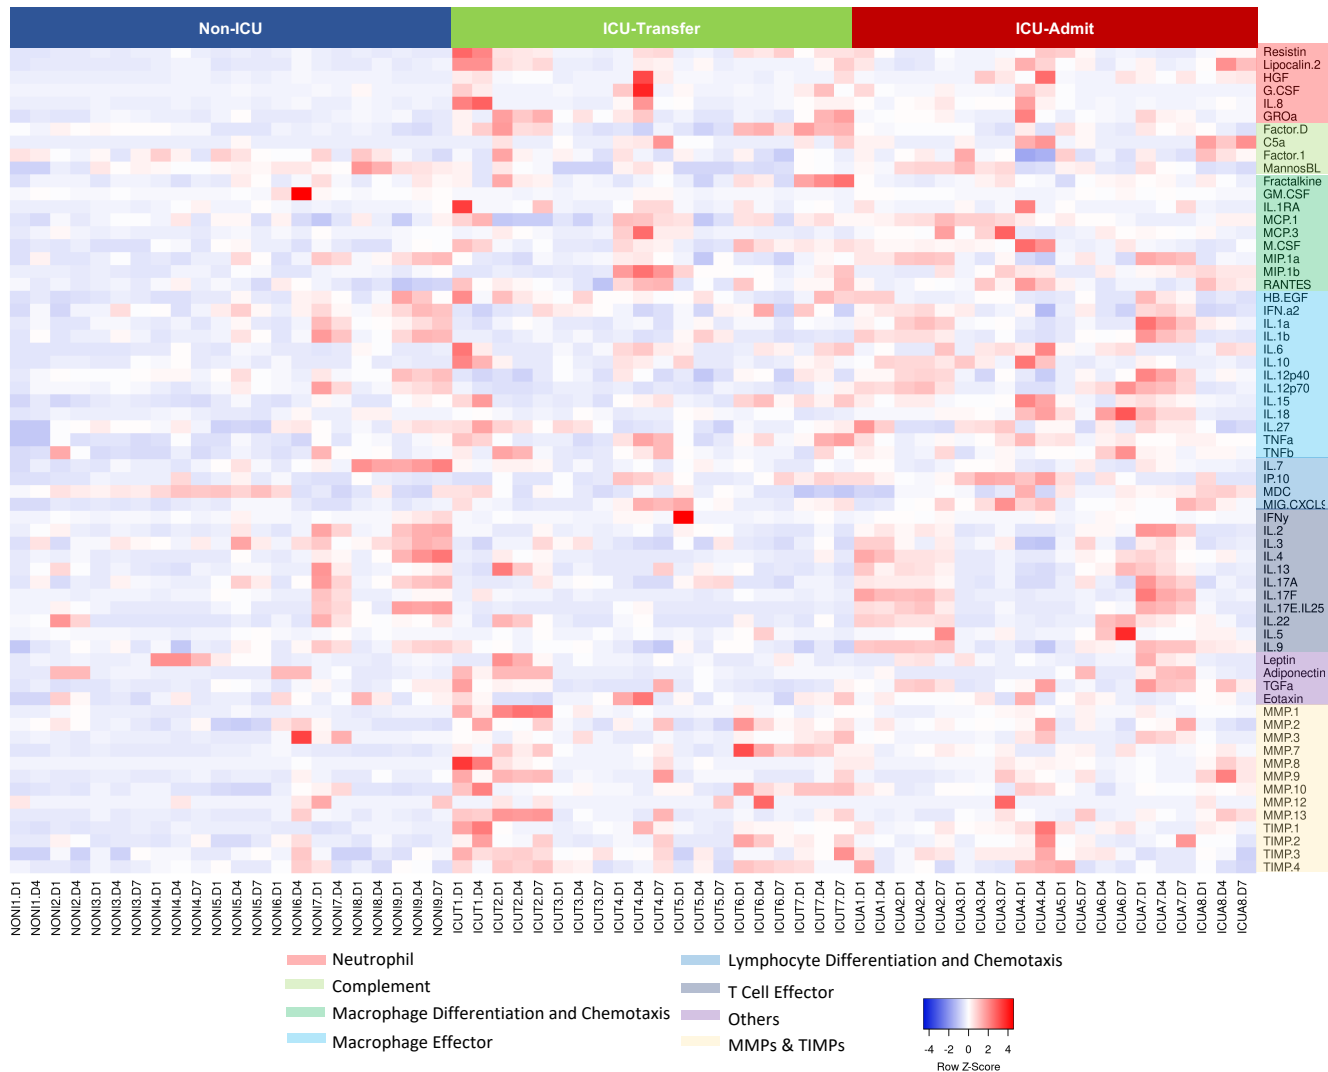

**b**

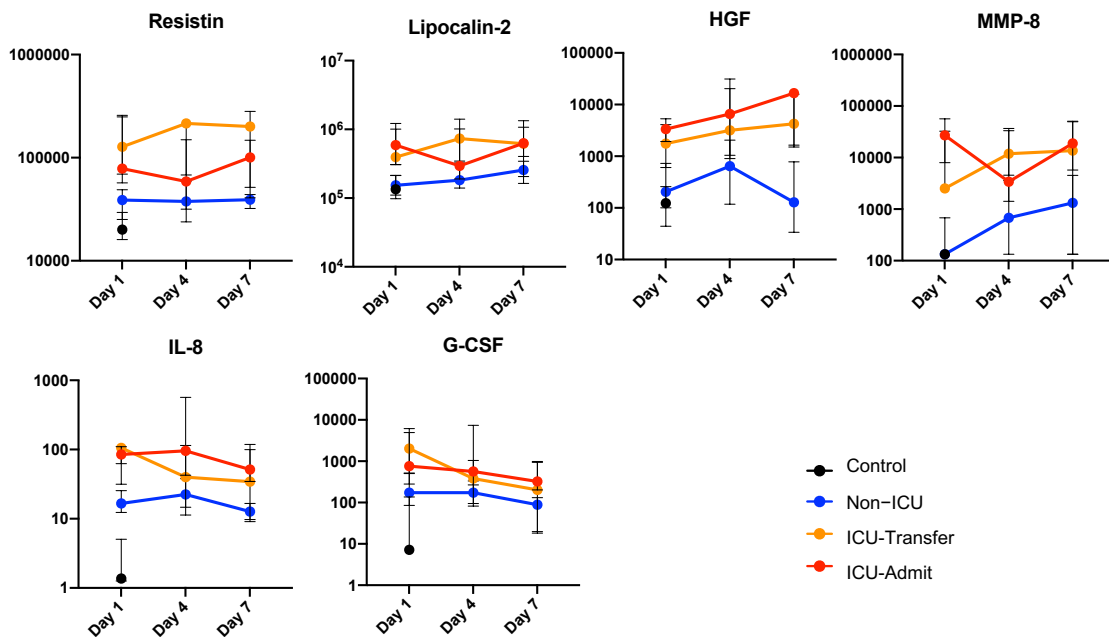



**Supplementary Figure 4.** (a) Heatmap indicating relative protein levels detected in each subject of the longitudinal cohort at specified timepoints during hospitalization (columns) for all biomarkers tested (rows). Proteins are categorized by biological function and samples are labeled according to patient category (NONI: non-ICU, ICUT: ICU-Transfer, ICUA: ICU-Admit), numerical patient identifier within that category (1-9), and timepoint (D1: day 1, D4: day 4, D7: day 7). (b) Circulating levels of the neutrophil activation markers measured in the longitudinal cohort over time, comparing subjects categorized as: 1) controls, 2) non-ICU, 3) ICU-Transfer, and 4) ICU-Admit. 'Non-ICU' indicates patients who remained in a non-ICU unit until discharge; 'ICU-Transfer' indicates patients who were admitted to a non-ICU unit and were transferred to an ICU unit during hospitalization; 'ICU-Admit' indicates patients who were admitted directly to an ICU unit. Data is shown as median w/ interquartile range. All values are concentrations in pg/mL.

a

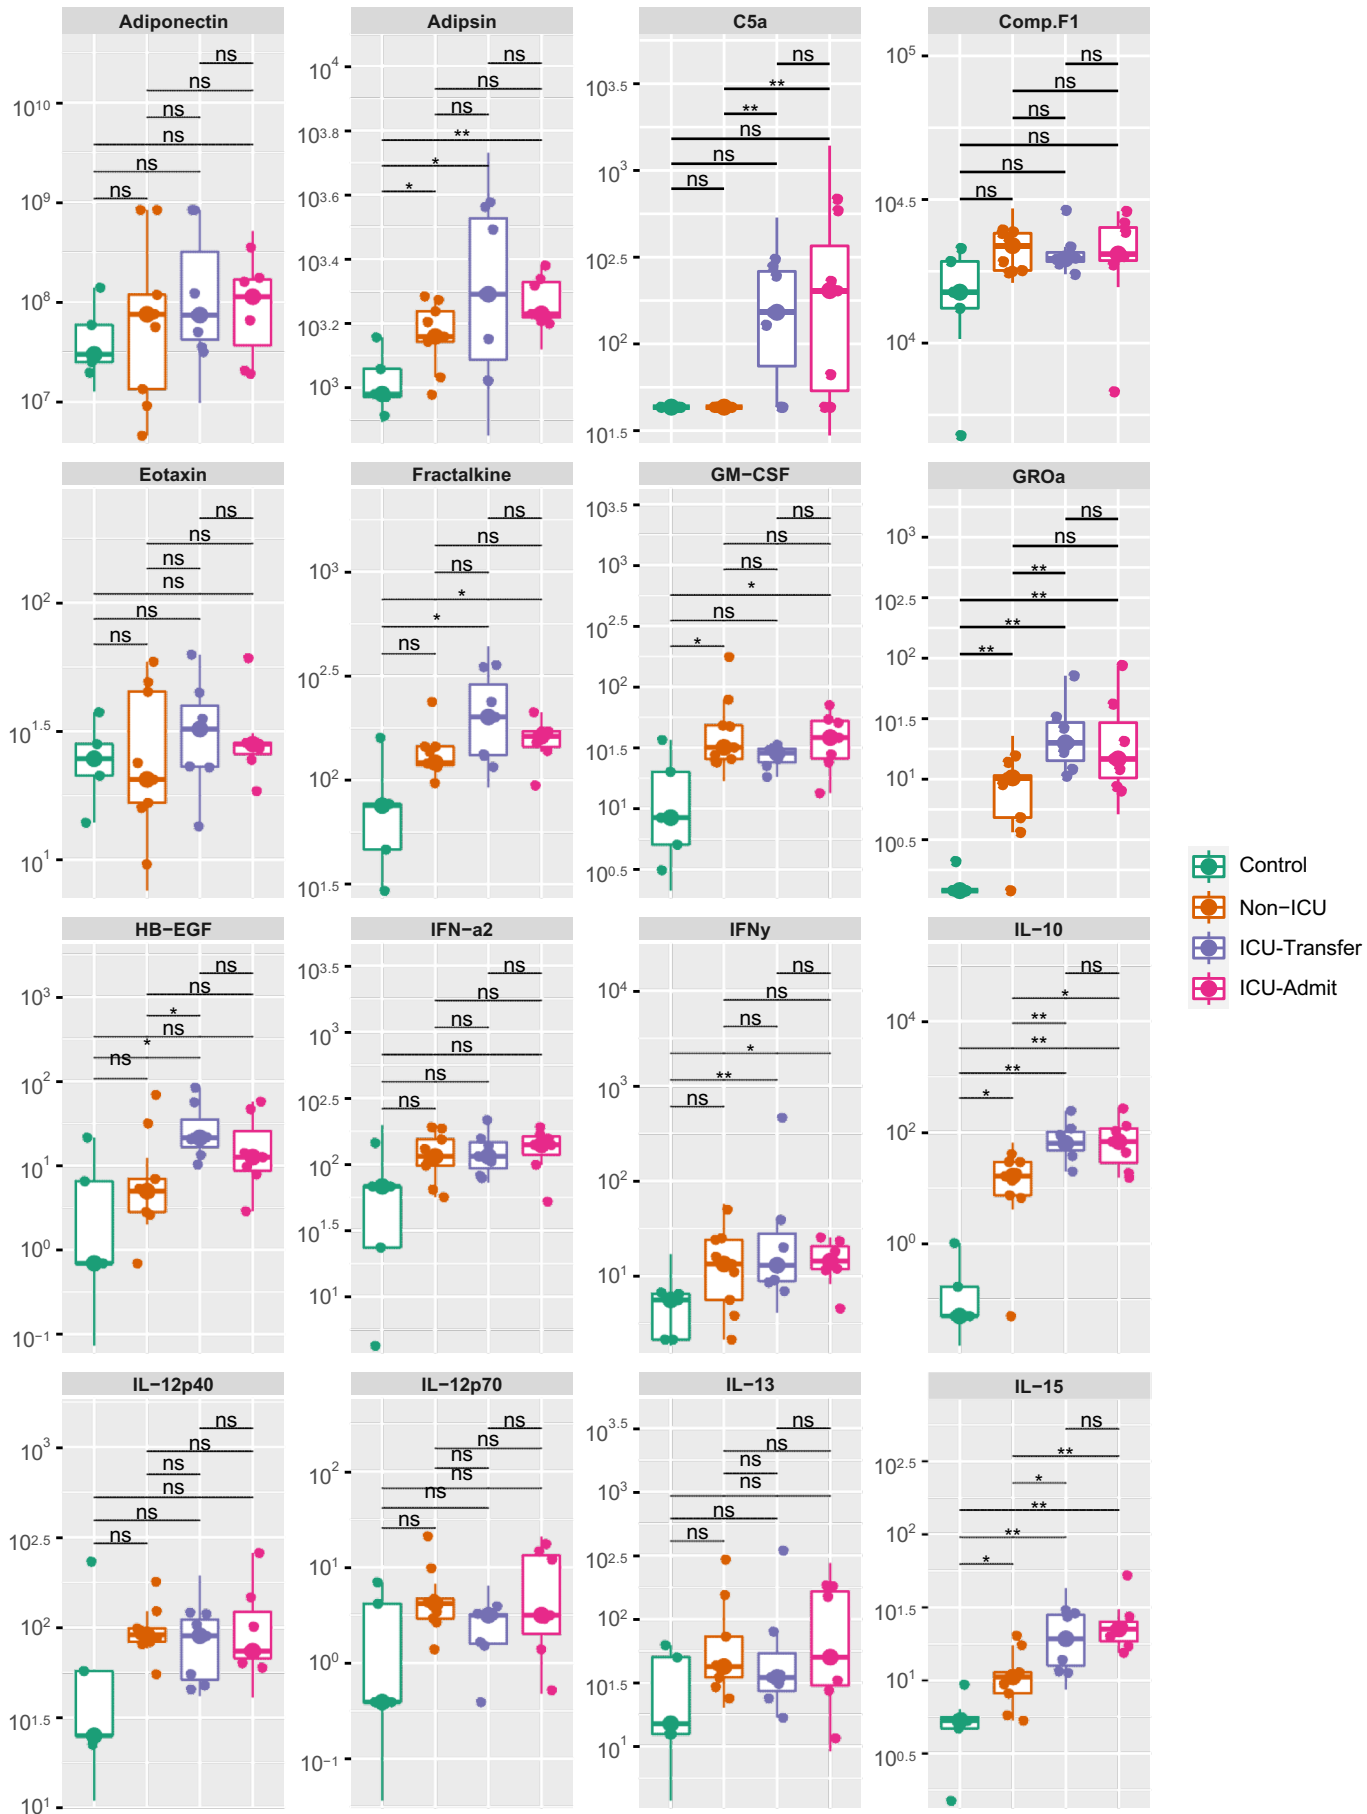

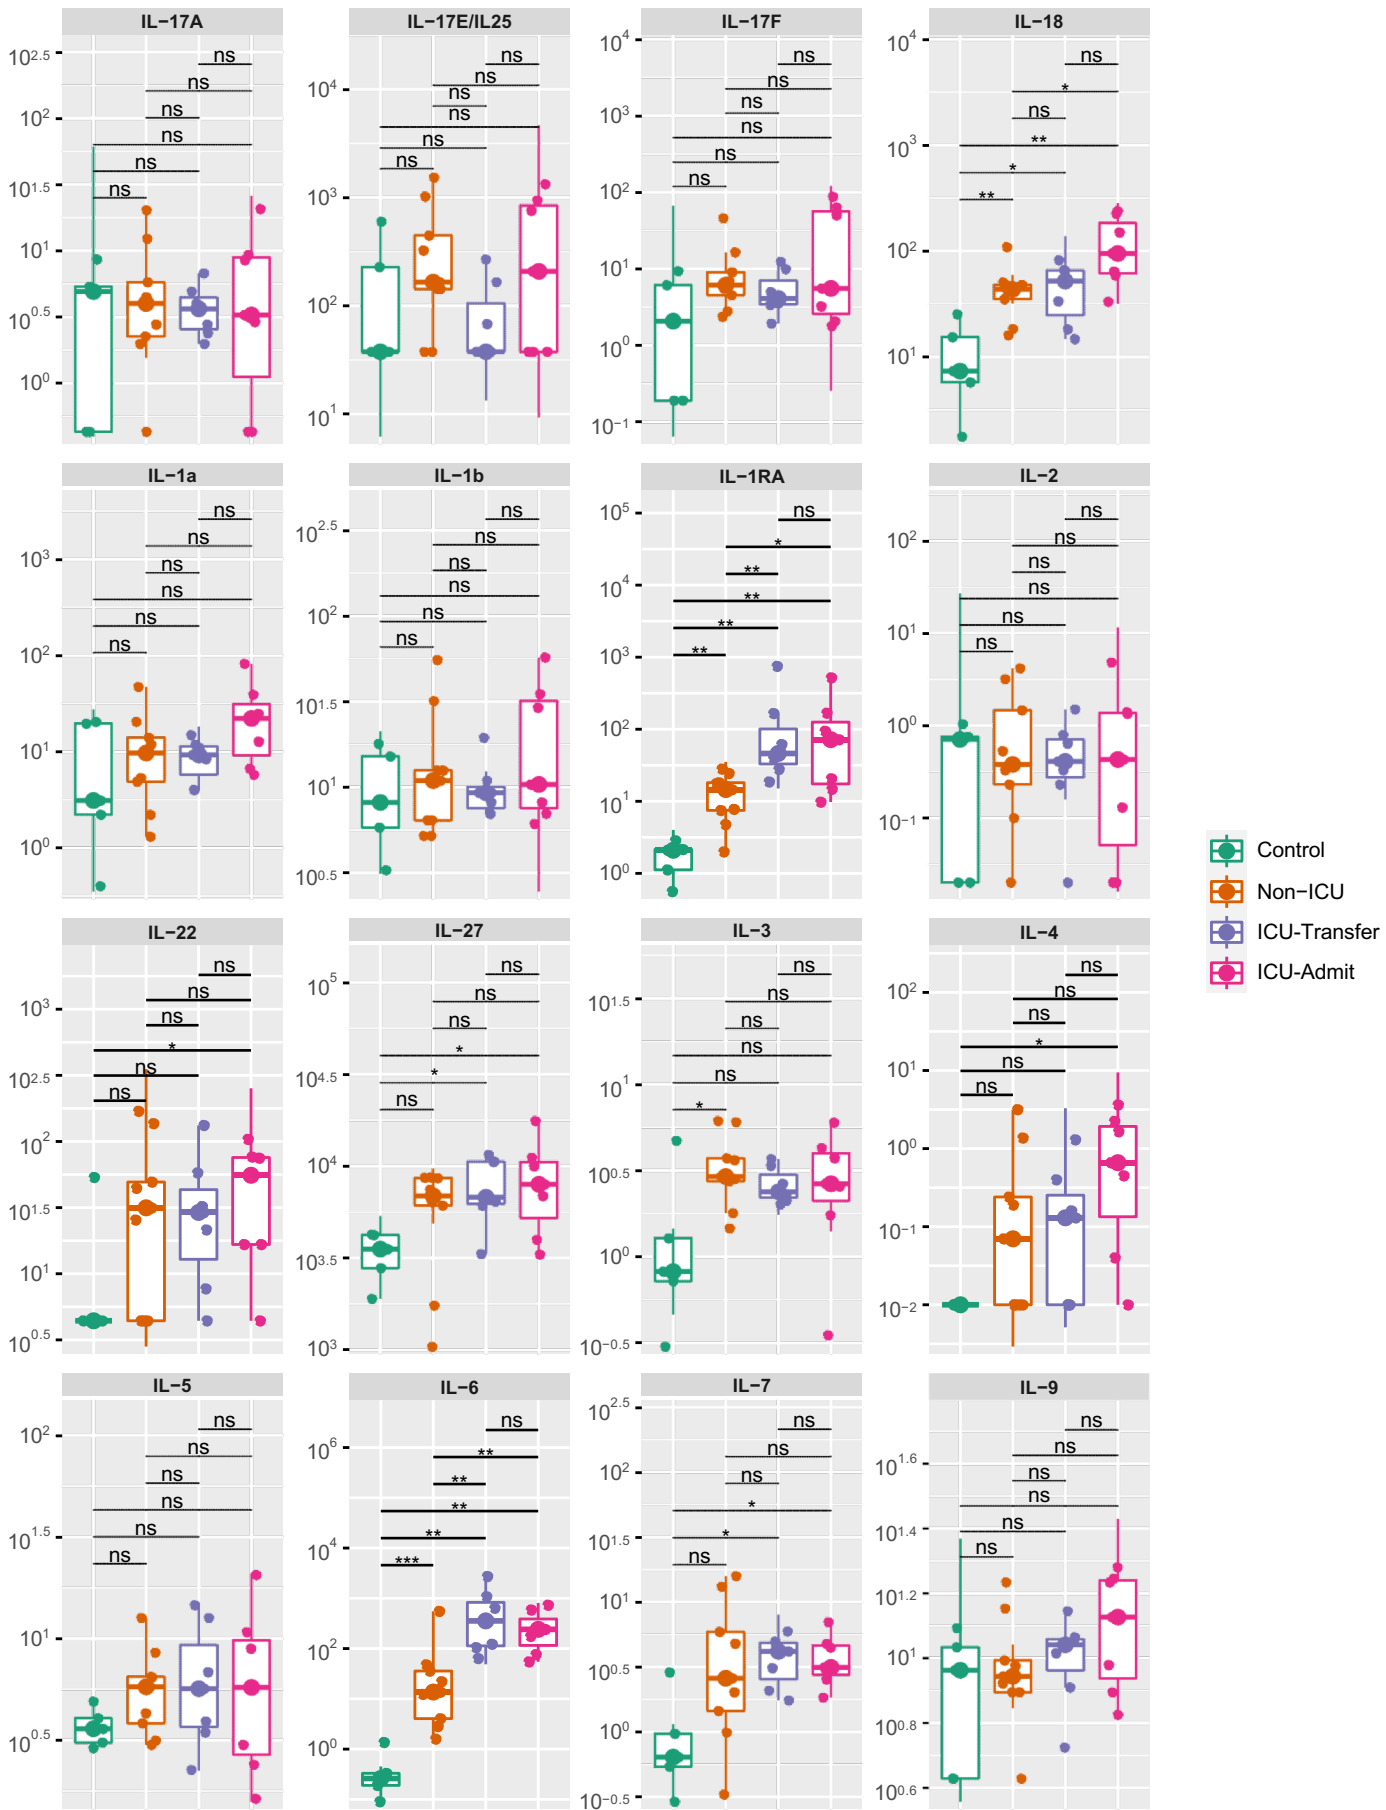

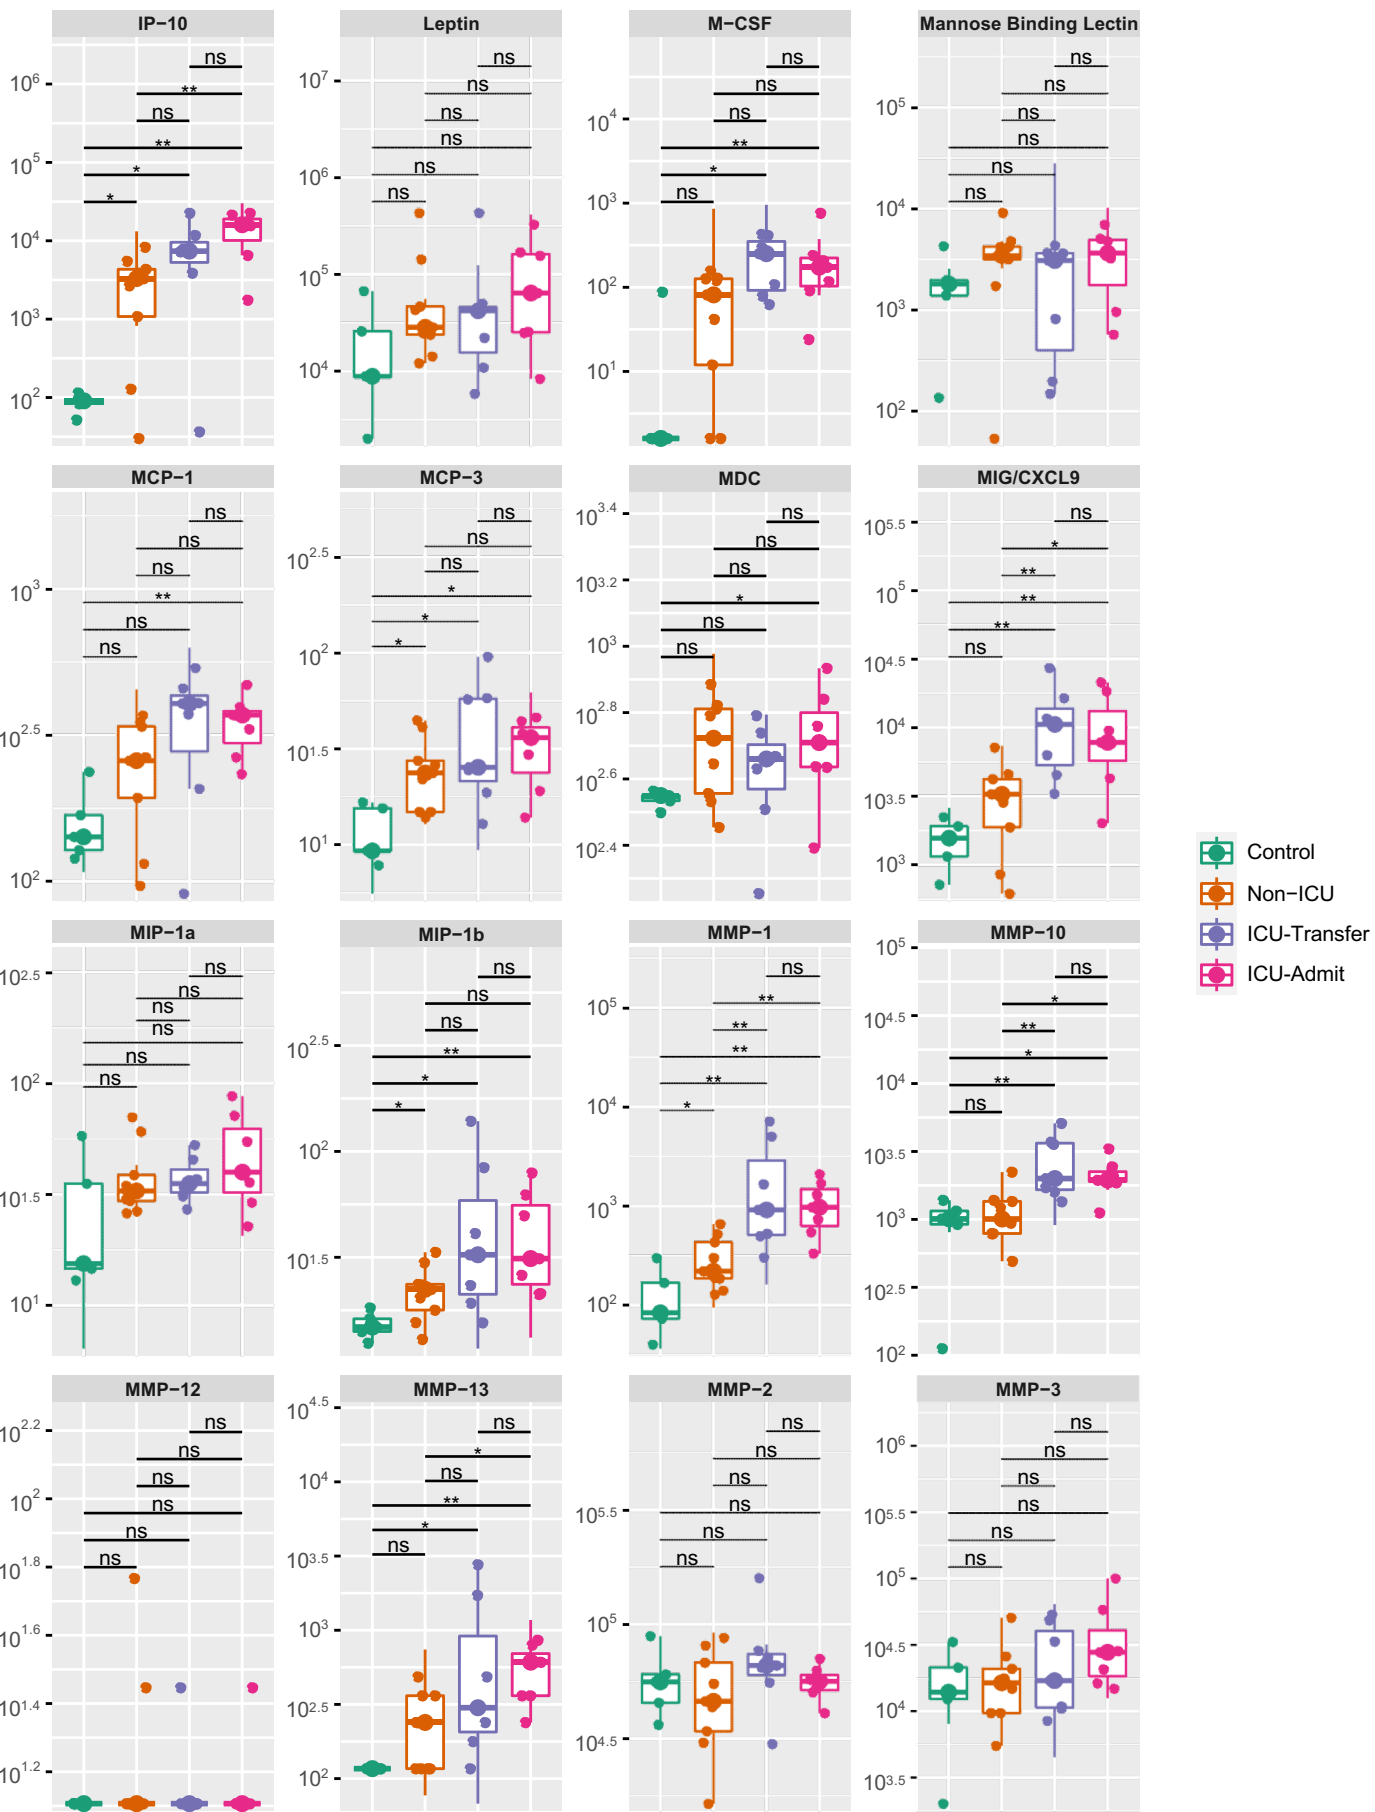

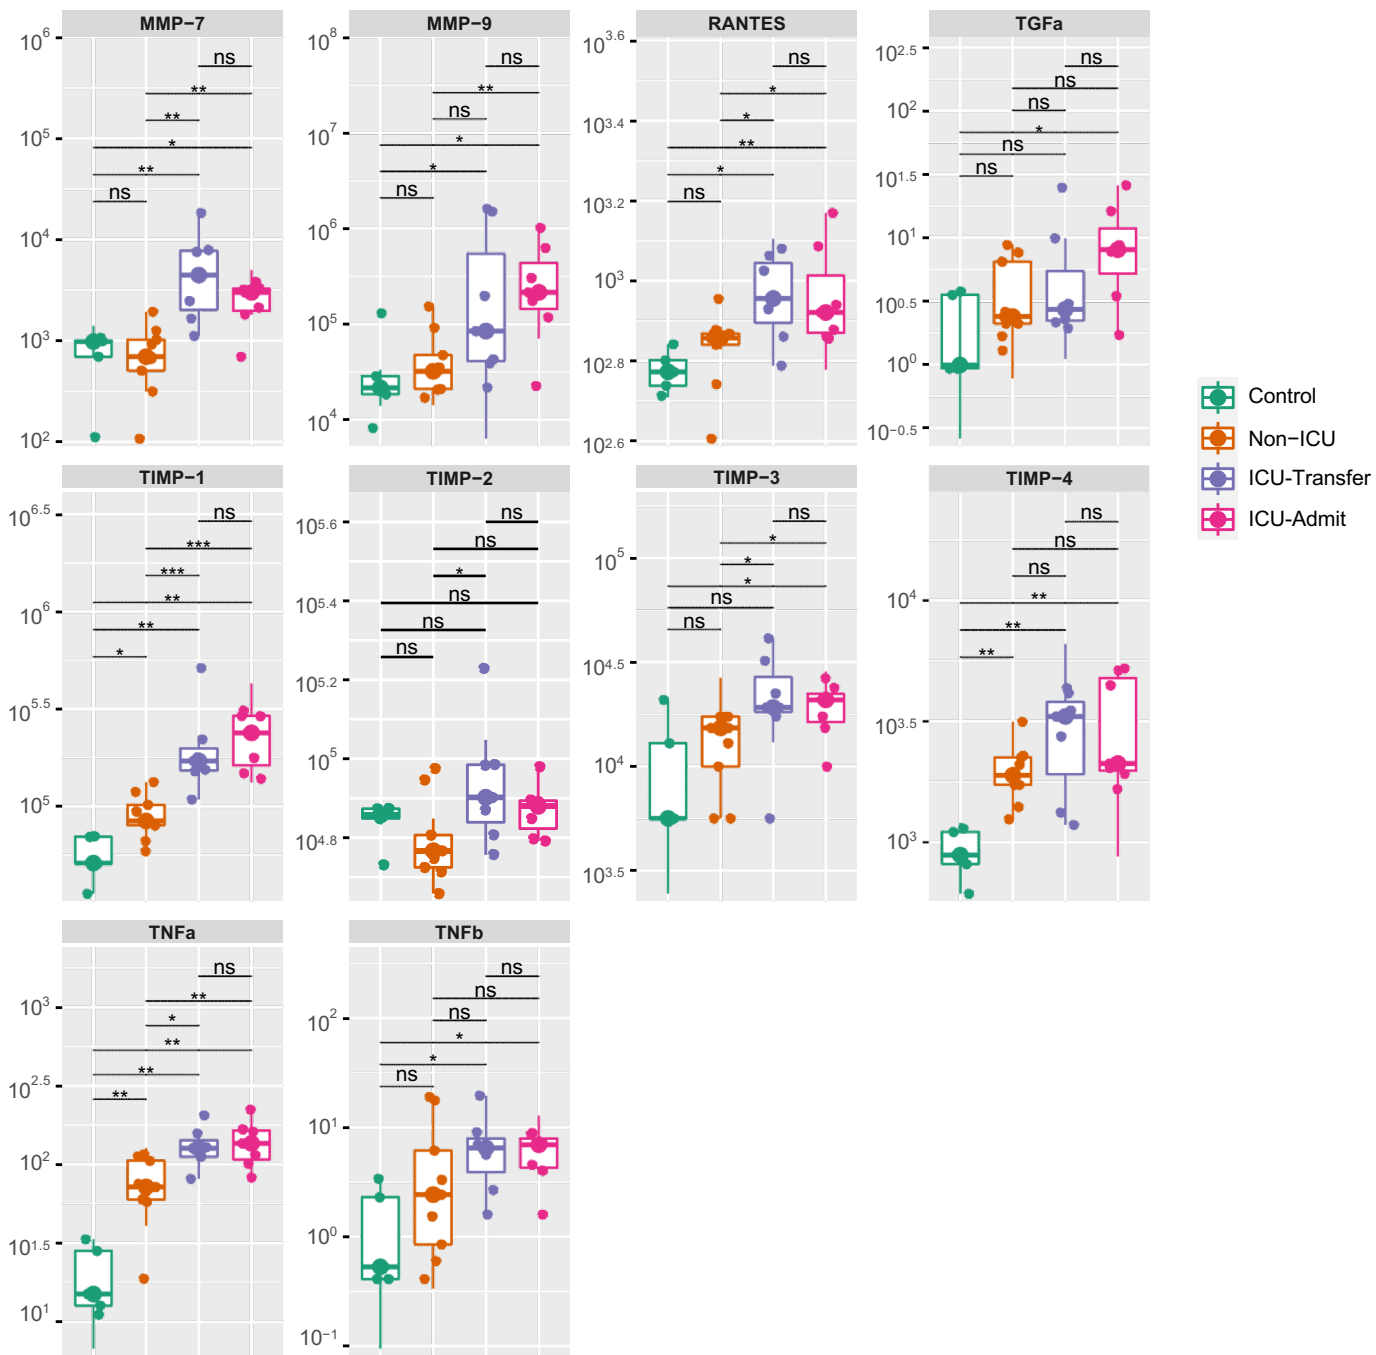

**b**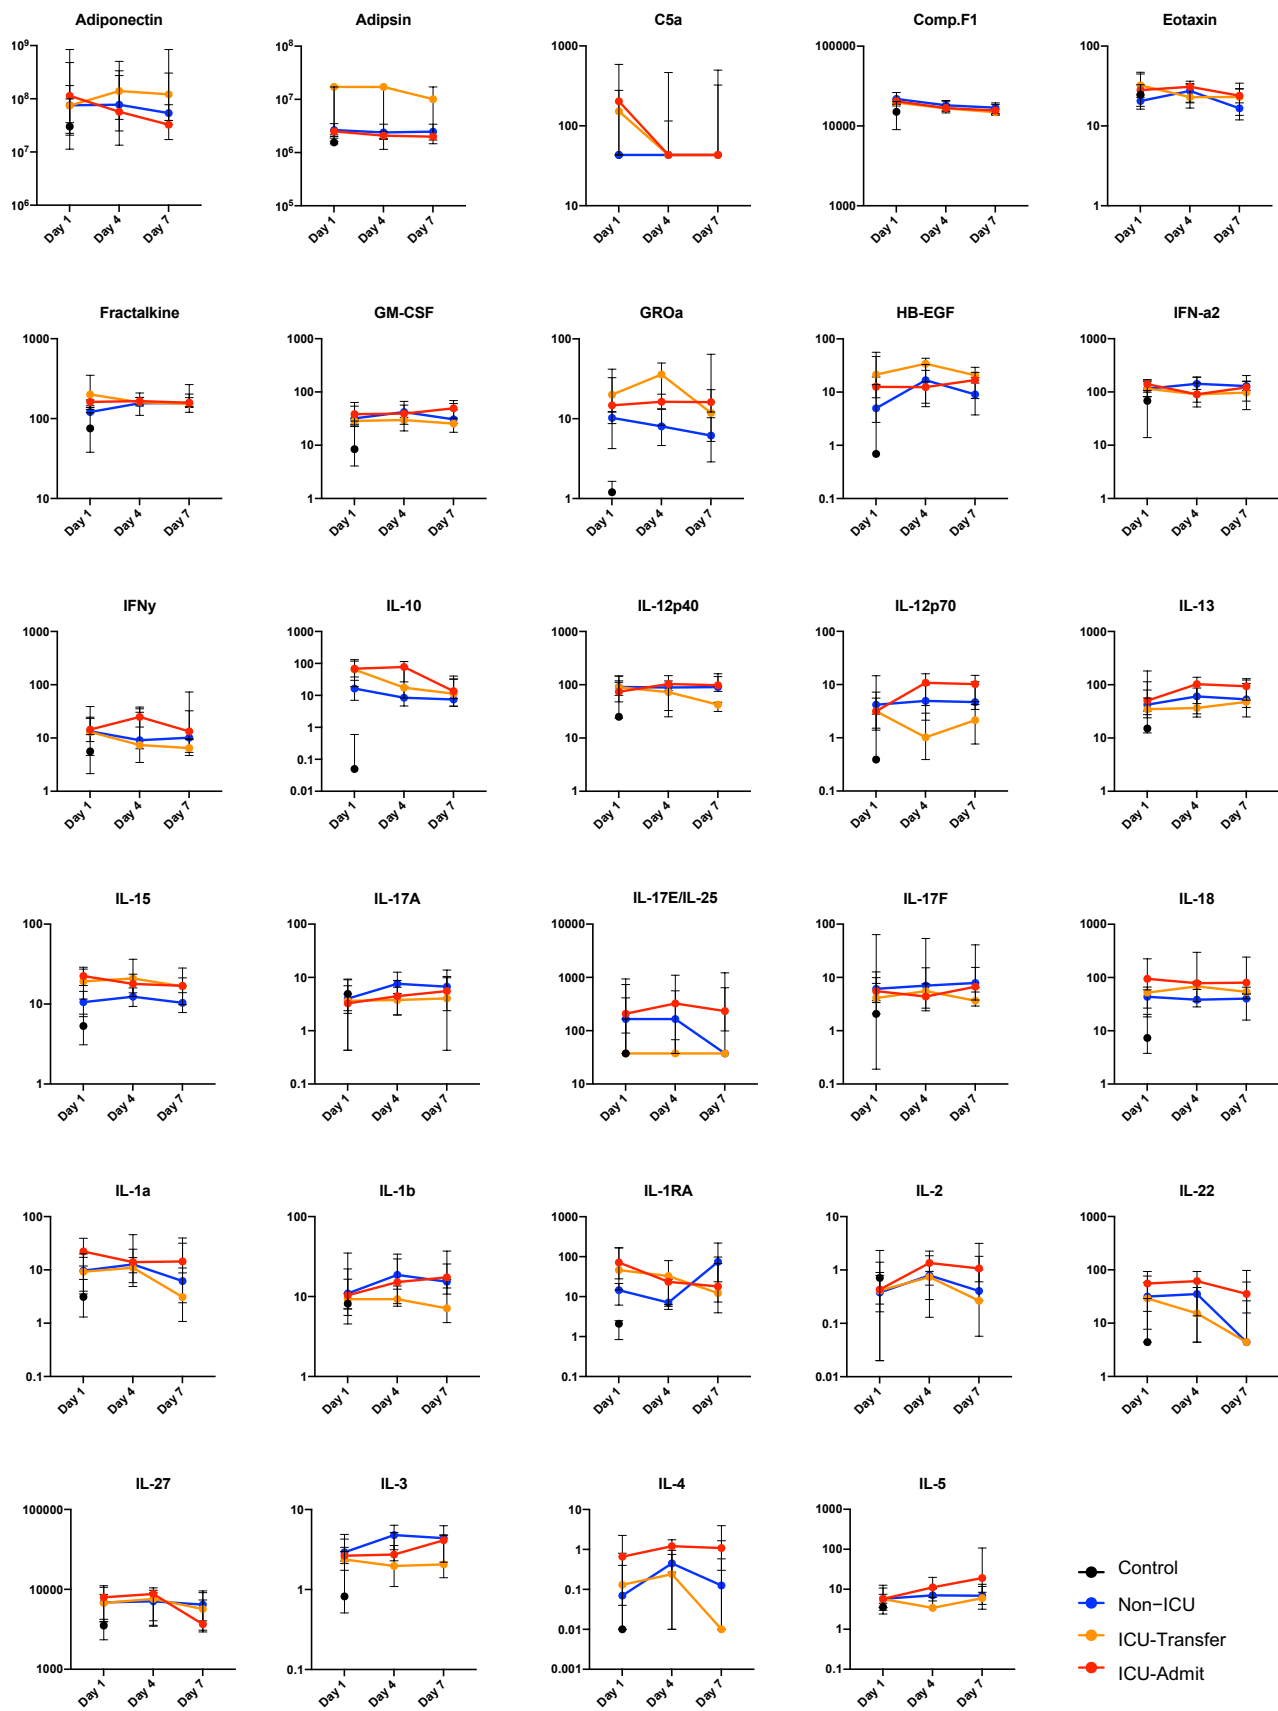

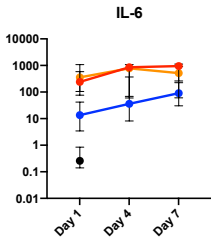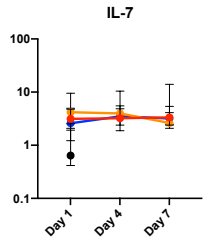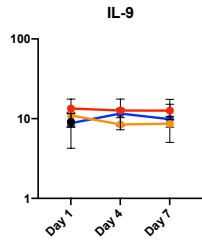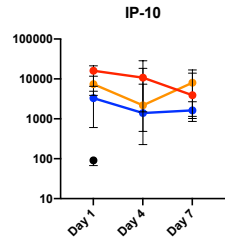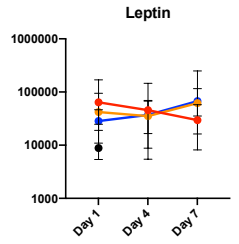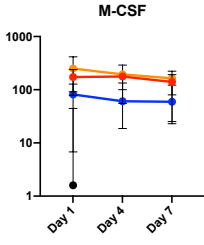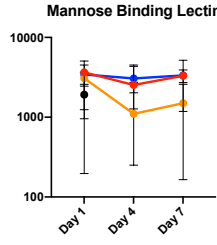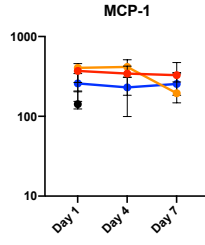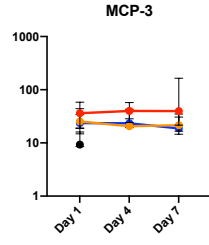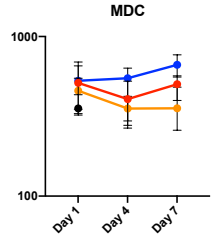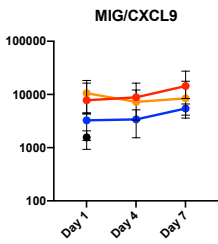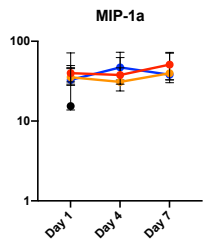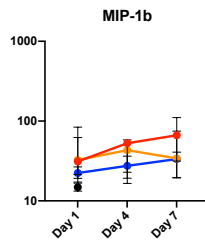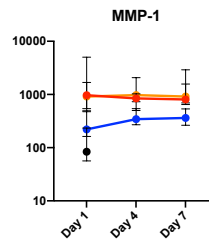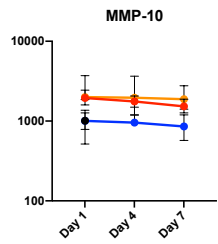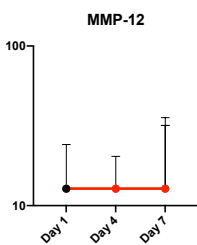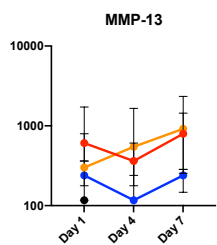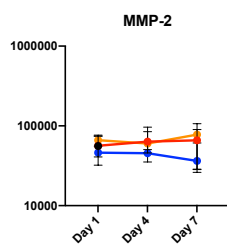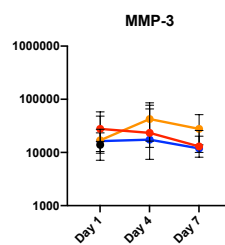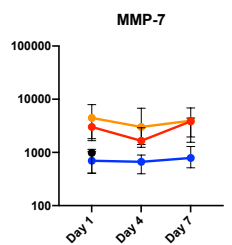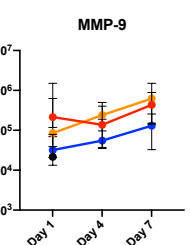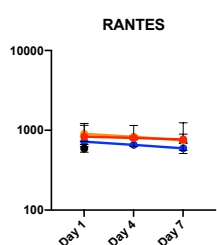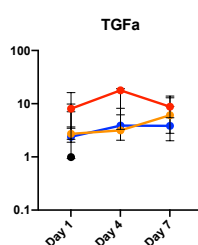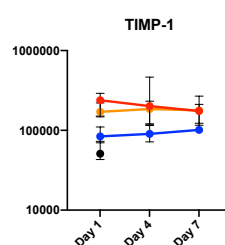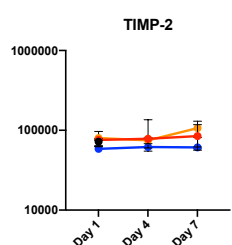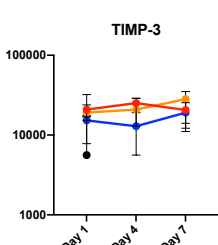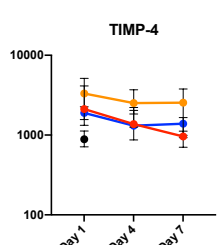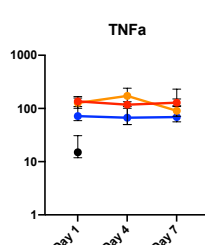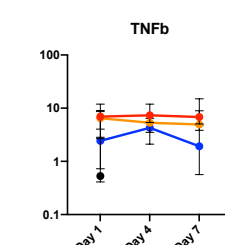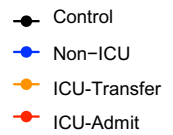

**Supplemental Figure 5.** Circulating levels of all measured biomarkers in the longitudinal cohort on (a) day 1, and (b) days 1, 4, and 7 of hospitalization, comparing subjects categorized as: 1) controls, 2) non-ICU, 3) ICU-Transfer, and 4) ICU-Admit. 'Non-ICU' indicates patients who remained in a non-ICU unit until discharge; 'ICU-Transfer' indicates patients who were admitted to a non-ICU unit and were transferred to an ICU unit during hospitalization; 'ICU-Admit' indicates patients who were admitted directly to an ICU unit. For Day 1 samples, asterisks denote statistically significant differences between groups ( $*p < 0.05$ ,  $**p < 0.01$ ,  $***p < 0.001$ ,  $****p < 0.0001$ ). Data is shown as median with interquartile range. All values are concentrations in pg/mL, except for CF1, adipsin, and mannose binding lectin, which are reported as ng/mL.



# Supplementary Figure 6

| Cytokines              | ANC D1 |        |
|------------------------|--------|--------|
|                        | R      | p      |
| MMP-8                  | 0.86   | 0.0000 |
| MMP-9                  | 0.82   | 0.0000 |
| Resistin               | 0.76   | 0.0000 |
| Lipocalin-2            | 0.73   | 0.0001 |
| MMP-13                 | 0.70   | 0.0003 |
| TIMP-4                 | 0.67   | 0.0007 |
| MMP-1                  | 0.66   | 0.0009 |
| TNFa                   | 0.65   | 0.0011 |
| TIMP-1                 | 0.65   | 0.0011 |
| HGF                    | 0.60   | 0.0031 |
| IL-15                  | 0.58   | 0.0047 |
| HB-EGF                 | 0.58   | 0.0051 |
| IL-4                   | 0.57   | 0.0051 |
| TIMP-3                 | 0.56   | 0.0069 |
| TGFa                   | 0.56   | 0.0070 |
| Fractalkine            | 0.55   | 0.0075 |
| MMP-10                 | 0.53   | 0.0107 |
| IL-7                   | 0.52   | 0.0122 |
| MMP-7                  | 0.51   | 0.0145 |
| IL-27                  | 0.51   | 0.0154 |
| MMP-3                  | 0.50   | 0.0166 |
| TNFb                   | 0.50   | 0.0187 |
| IL-1RA                 | 0.47   | 0.0281 |
| RANTES                 | 0.44   | 0.0395 |
| Adipsin                | 0.41   | 0.0587 |
| TIMP-2                 | 0.40   | 0.0631 |
| IL-8                   | 0.39   | 0.0719 |
| M-CSF                  | 0.39   | 0.0724 |
| MMP-12                 | 0.39   | 0.0756 |
| G-CSF                  | 0.38   | 0.0794 |
| IL-6                   | 0.36   | 0.1034 |
| IL-9                   | 0.36   | 0.1047 |
| IL-22                  | 0.35   | 0.1093 |
| IL-18                  | 0.35   | 0.1100 |
| Adiponectin            | 0.35   | 0.1155 |
| C5a                    | 0.31   | 0.1572 |
| MIP-1a                 | 0.31   | 0.1601 |
| GROa                   | 0.31   | 0.1617 |
| IL-1a                  | 0.30   | 0.1726 |
| Comp.F1                | 0.24   | 0.2806 |
| IL-17F                 | 0.22   | 0.3219 |
| IL-1b                  | 0.22   | 0.3264 |
| MMP-2                  | 0.21   | 0.3373 |
| IL-13                  | 0.21   | 0.3397 |
| Mannose Binding Lectin | 0.19   | 0.3847 |
| IL-10                  | 0.19   | 0.3960 |
| IL-17E/IL25            | 0.18   | 0.4114 |
| GM-CSF                 | 0.14   | 0.5272 |
| MCP-3                  | 0.13   | 0.5745 |
| IP-10                  | 0.12   | 0.6060 |
| IL-2                   | 0.11   | 0.6307 |
| IL-17A                 | 0.10   | 0.6609 |
| MIP-1b                 | 0.07   | 0.7415 |
| IFN-a2                 | 0.06   | 0.7977 |
| IL-3                   | 0.04   | 0.8750 |
| MIG/CXCL9              | 0.03   | 0.8888 |
| IL-12p70               | 0.02   | 0.9462 |
| MCP-1                  | -0.02  | 0.9344 |
| IL-5                   | -0.04  | 0.8505 |
| Leptin                 | -0.05  | 0.8222 |
| IL-12p40               | -0.09  | 0.7040 |
| IFNy                   | -0.13  | 0.5644 |
| Eotaxin                | -0.17  | 0.4462 |
| MDC                    | -0.29  | 0.1935 |

**Supplementary Figure 6.** Correlations of all measured biomarkers with absolute neutrophil count (ANC) in blood samples collected within 24 hours of hospital admission (day 1) for the longitudinal cohort. R, Spearman's rank correlation coefficient; p, p-value.

# Supplementary Figure 7

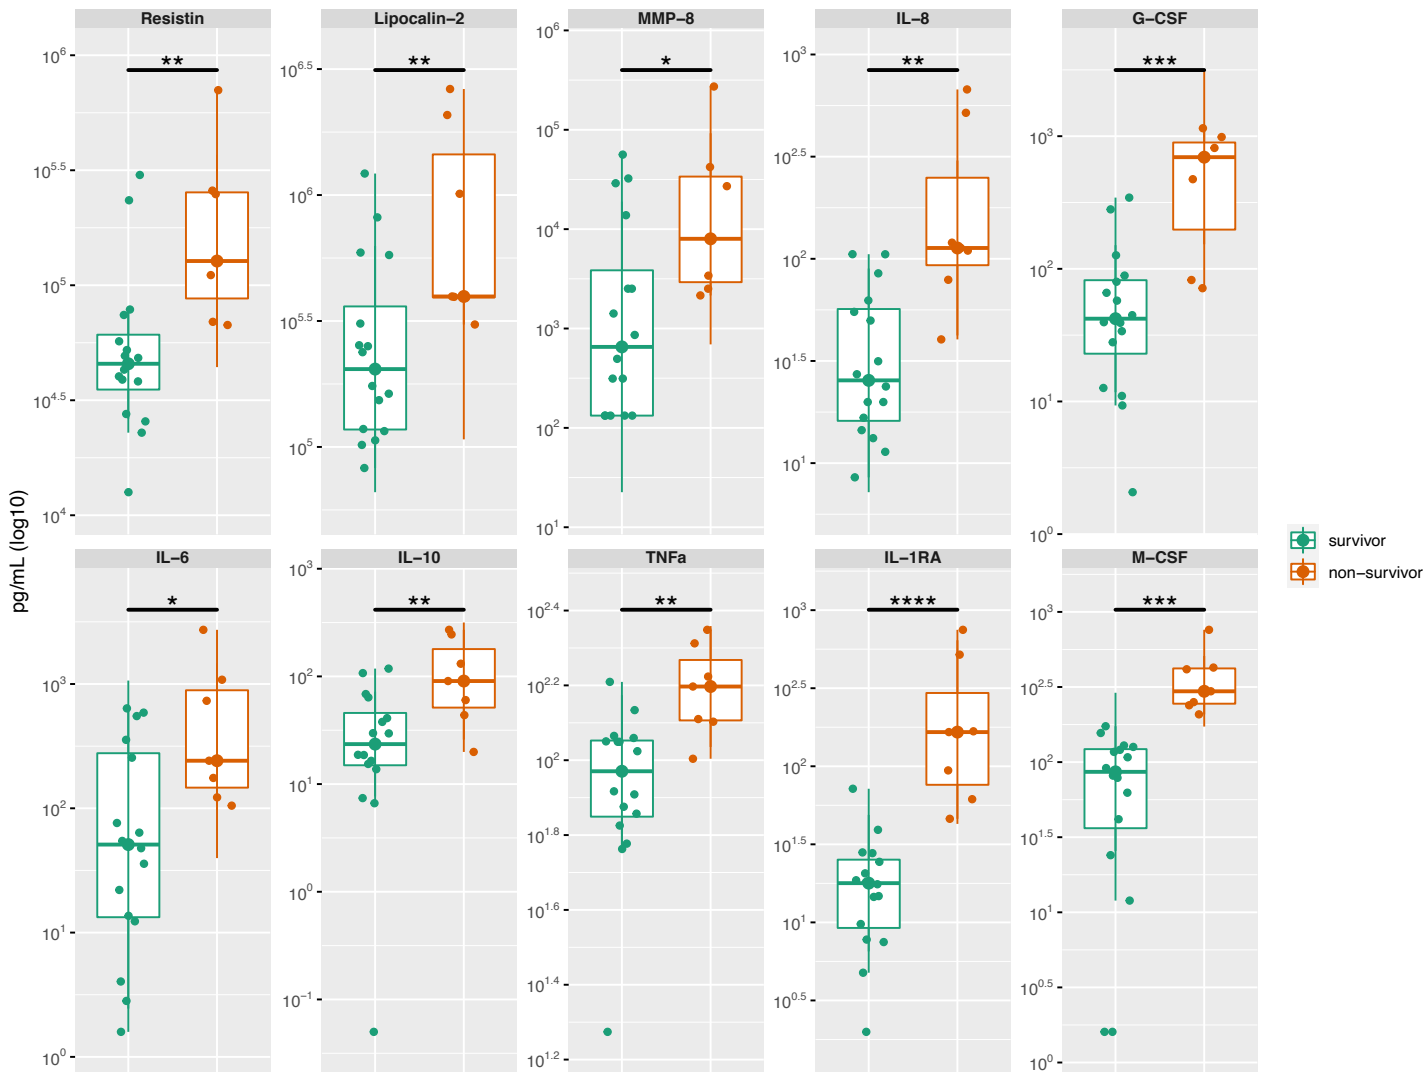

**Supplementary Figure 7.** Levels of neutrophil (row 1) and macrophage (row 2) activation markers from blood samples collected within 24 hours of hospitalization (day 1) for the longitudinal cohort, comparing patients who were discharged alive (survivors) and those who died (non-survivors). Asterisks denote statistically significant differences between groups ( $*p < 0.05$ ,  $**p < 0.01$ ,  $***p < 0.001$ ,  $****p < 0.0001$ ). Data is shown as median with interquartile range. All values are concentrations in pg/mL.

**a**

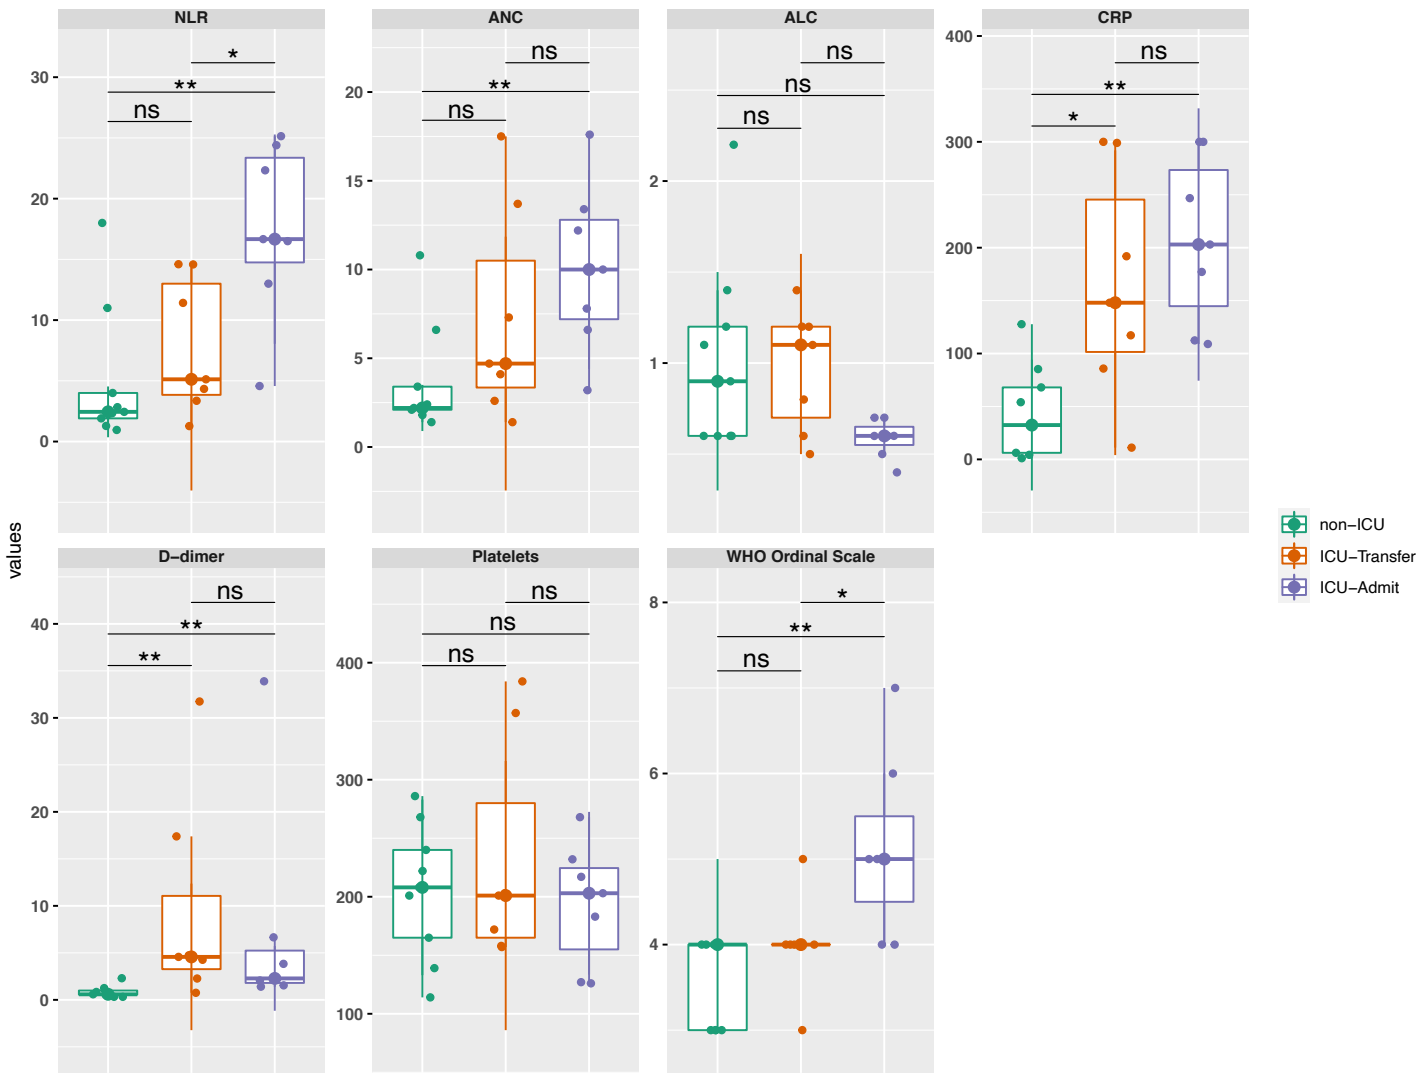

**b**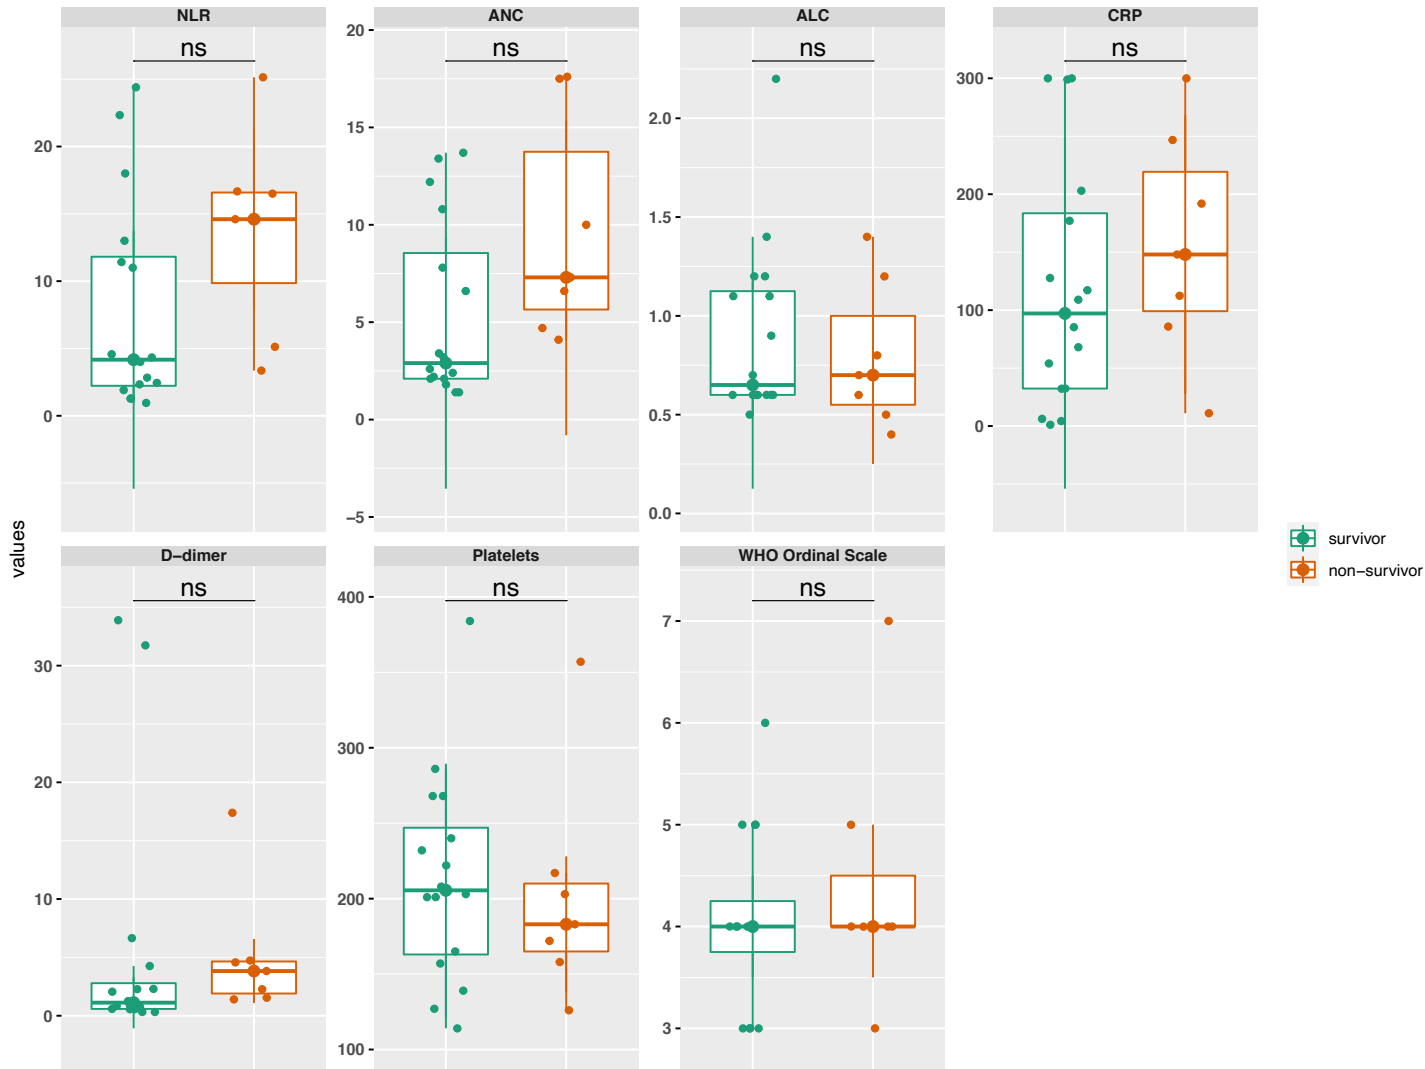

**Supplementary Figure 8.** Established clinical markers of disease severity in COVID-19 were assessed from blood samples collected on day 1 in the longitudinal cohort, and the WHO Ordinal Scale was assessed based on oxygen requirements at the time of day 1 blood draw, comparing (a) patients categorized as 1) non-ICU, 2) ICU-Transfer, and 3) ICU-Admit, and (b) patients who were discharged alive (survivors) and those who died (non-survivors). 'Non-ICU' indicates patients who remained in a non-ICU unit until discharge; 'ICU-Transfer' indicates patients who were admitted to a non-ICU unit and were transferred to an ICU unit during hospitalization; 'ICU-Admit' indicates patients who were admitted directly to an ICU unit. Asterisks denote statistically significant differences between groups ( $*p < 0.05$ ,  $**p < 0.01$ ,  $***p < 0.001$ ,  $****p < 0.0001$ ). Data is shown as median with interquartile range. ALC: Absolute lymphocyte count; ANC: Absolute neutrophil count; CRP: C-reactive protein; NLR: Neutrophil-to-lymphocyte ratio; WHO: World Health Organization.
